# Supplementary material
Source: Research Square preprint supplement (doi:10.21203/rs.3.rs-9323088/v1)
Supplement: Supplementary file 1 [file 33372be5650cfeb7ee237009.docx]

**Supplementary Table S1.** Number of cases and prevalence of congenital anomalies per 10,000 live births according to ICD-10 group and year, São Paulo, Brazil, 2015–2023.

| **Type of anomaly** | **2015** | **2016** | **2017** | **2018** | **2019** | **2020** | **2021** | **2022** | **2023** |
| --- | --- | --- | --- | --- | --- | --- | --- | --- | --- |
| Chromosomal abnormalities | 241 (4.64) | 259 (5.17) | 236 (4.59) | 225 (4.41) | 240 (4.88) | 277 (5.91) | 234 (5.21) | 259 (5.89) | 223 (5.12) |
| Circulatory system | 864 (16.64) | 1031 (20.59) | 1210 (23.55) | 1207 (23.65) | 1063 (21.61) | 1124 (23.97) | 1121 (24.94) | 1146 (26.07) | 1384 (31.79) |
| Cleft lip and cleft palate | 324 (6.24) | 361 (7.21) | 342 (6.66) | 313 (6.13) | 273 (5.55) | 269 (5.74) | 259 (5.76) | 302 (6.87) | 285 (6.55) |
| Digestive system | 246 (4.74) | 417 (8.33) | 449 (8.74) | 474 (9.29) | 387 (7.87) | 452 (9.64) | 401 (8.92) | 448 (10.19) | 719 (16.51) |
| Eye, ear, face and neck | 461 (8.88) | 499 (9.96) | 534 (10.39) | 553 (10.84) | 482 (9.80) | 393 (8.38) | 378 (8.41) | 420 (9.55) | 482 (11.07) |
| Genital organs | 410 (7.90) | 480 (9.58) | 520 (10.12) | 492 (9.64) | 429 (8.72) | 445 (9.49) | 414 (9.21) | 407 (9.26) | 434 (9.97) |
| Musculoskeletal system | 1800 (34.67) | 1913 (38.20) | 1993 (38.79) | 2059 (40.35) | 1854 (37.69) | 1723 (36.74) | 1721 (38.29) | 1784 (40.58) | 1804 (41.43) |
| Nervous system | 592 (11.40) | 822 (16.41) | 652 (12.69) | 646 (12.66) | 563 (11.45) | 489 (10.43) | 459 (10.21) | 479 (10.89) | 493 (11.32) |
| Others | 249 (4.80) | 228 (4.55) | 223 (4.34) | 233 (4.57) | 193 (3.92) | 210 (4.48) | 164 (3.65) | 159 (3.62) | 172 (3.95) |
| Respiratory system | 61 (1.17) | 74 (1.48) | 91 (1.77) | 113 (2.21) | 90 (1.83) | 74 (1.58) | 76 (1.69) | 76 (1.73) | 86 (1.98) |
| Urinary system | 133 (2.56) | 146 (2.92) | 149 (2.90) | 152 (2.98) | 125 (2.54) | 113 (2.41) | 106 (2.36) | 114 (2.59) | 149 (3.42) |
| Total | 5395 (103.90) | 6253 (124.85) | 6442 (125.38) | 6511 (127.59) | 5730 (116.49) | 5622 (119.88) | 5373 (119.55) | 5625 (127.94) | 6266 (143.92) |

**Note:** Values are presented as number of cases (prevalence per 10,000 live births).
